# Supplementary material for: Differentiating between liver diseases by applying multiclass machine learning approaches to transcriptomics of liver tissue or blood-based samples
Source: PubMed Central journal article supplement (PMC9472076; doi:10.1016/j.jhepr.2022.100560), 2022-08-18
Supplement: mmc2.pdf [file mmc2.pdf]

## JHEP Reports

### CTAT methods

Tables for a “Complete, Transparent, Accurate and Timely account” (CTAT) are now mandatory for all revised submissions. The aim is to enhance the reproducibility of methods.

- Only include the parts relevant to your study
- Refer to the CTAT in the main text as ‘Supplementary CTAT Table’
- Do not add subheadings
- Add as many rows as needed to include all information
- Only include one item per row

If the CTAT form is not relevant to your study, please outline the reasons why:

|  |
|--|
|  |
|--|

#### 1.1 Antibodies

| Name | Citation | Supplier | Cat no. | Clone no. |
|------|----------|----------|---------|-----------|
| NA   |          |          |         |           |

#### 1.2 Cell lines

| Name | Citation | Supplier | Cat no. | Passage no. | Authentication test method |
|------|----------|----------|---------|-------------|----------------------------|
| NA   |          |          |         |             |                            |

#### 1.3 Organisms

| Name | Citation | Supplier | Strain | Sex | Age | Overall n number |
|------|----------|----------|--------|-----|-----|------------------|
| NA   |          |          |        |     |     |                  |

#### 1.4 Sequence based reagents

| Name | Sequence | Supplier |
|------|----------|----------|
| NA   |          |          |

#### 1.5 Biological samples

| Description  | Source                                                                          | Identifier |
|--------------|---------------------------------------------------------------------------------|------------|
| PBMC         | Southern California Alcoholic Hepatitis Consortium (SCAHC)                      | NA         |
| Liver Tissue | SCAHC and University of Minnesota Liver Tissue Cell Distribution System (LTCDS) | NA         |

#### 1.6 Deposited data

Created : November, 2018

| Name of repository               | Identifier                 | Link                       |
|----------------------------------|----------------------------|----------------------------|
| RNAseq – dbGAP controlled access | In process upon acceptance | In process upon acceptance |

## 1.7 Software

| Software name                    | Manufacturer | Version     |
|----------------------------------|--------------|-------------|
| Cuffdiff (Cufflinks)             | Open source  | 2.2.1       |
| Enrichr                          | Open source  | NA          |
| Ingenuity Pathway Analysis (IPA) | Qiagen       | Winter 2021 |
| GSEA, GSEAPreranked              | Open source  | 4.2.3       |
| BloodGen3Module                  | Open source  | 1.4.0       |
| Python                           | Open source  | 3.7+        |
| RNASeqPower                      | Open source  | 1.34.0      |
| Scikit-learn                     | Open source  | 0.24.2+     |
| STAR                             | Open source  | 2.6.0       |

## 1.8 Other (e.g. drugs, proteins, vectors etc.)

|    |  |  |
|----|--|--|
| NA |  |  |
|    |  |  |

## 1.9 Please provide the details of the corresponding methods author for the manuscript:

Trina M. Norden-Krichmar  
 Department of Epidemiology and Biostatistics  
 University of California  
 Irvine, CA 92697 USA

Phone number: +1 949-824-8802  
 Fax number: None  
 Email: [tnordenk@uci.edu](mailto:tnordenk@uci.edu)

## 2.0 Please confirm for randomised controlled trials all versions of the clinical protocol are included in the submission. These will be published online as supplementary information.

NA
